# Supplementary material for: Identification of unique cardiolipin and monolysocardiolipin species in Acinetobacter baumannii
Source: Springer Nature journal article supplement (doi:10.1038/s41598-017-03214-w), 2017-06-01
Supplement: MOESM1 [file 41598_2017_3214_MOESM1_ESM.pdf]

**Identification of unique cardiolipin and monolysocardiolipin species  
in *Acinetobacter baumannii*.**

Patrizia Lopalco<sup>1</sup>, Julia Stahl<sup>2</sup>, Cosimo Annese<sup>3</sup>, Beate Averhoff<sup>2</sup>, Angela Corcelli<sup>1,4\*</sup>

<sup>1</sup>Department of Basic Medical Sciences, Neurosciences and Sensory Organs,  
University of Bari A Moro, Bari, Italy;

<sup>2</sup>Department of Molecular Microbiology & Bioenergetics, Institute of Molecular Biosciences,  
Goethe-University Frankfurt am Main, Germany;

<sup>3</sup>CNR-ICCOM, Bari, Italy

<sup>4</sup>Institute for Chemical-Physical Processes, National Research Council (CNR- IPCF), Bari, Italy;

\*Correspondence to: Angela Corcelli, Dipartimento di Scienze Mediche di Base, Neuroscienze e  
Organi di Senso, Università di Bari A. Moro, Piazza G. Cesare, 70124 Bari, Italy. Tel.: + 39 080  
5448530. E-mail address: [a.corcelli@uniba.it](mailto:a.corcelli@uniba.it)

**Supplementary information**

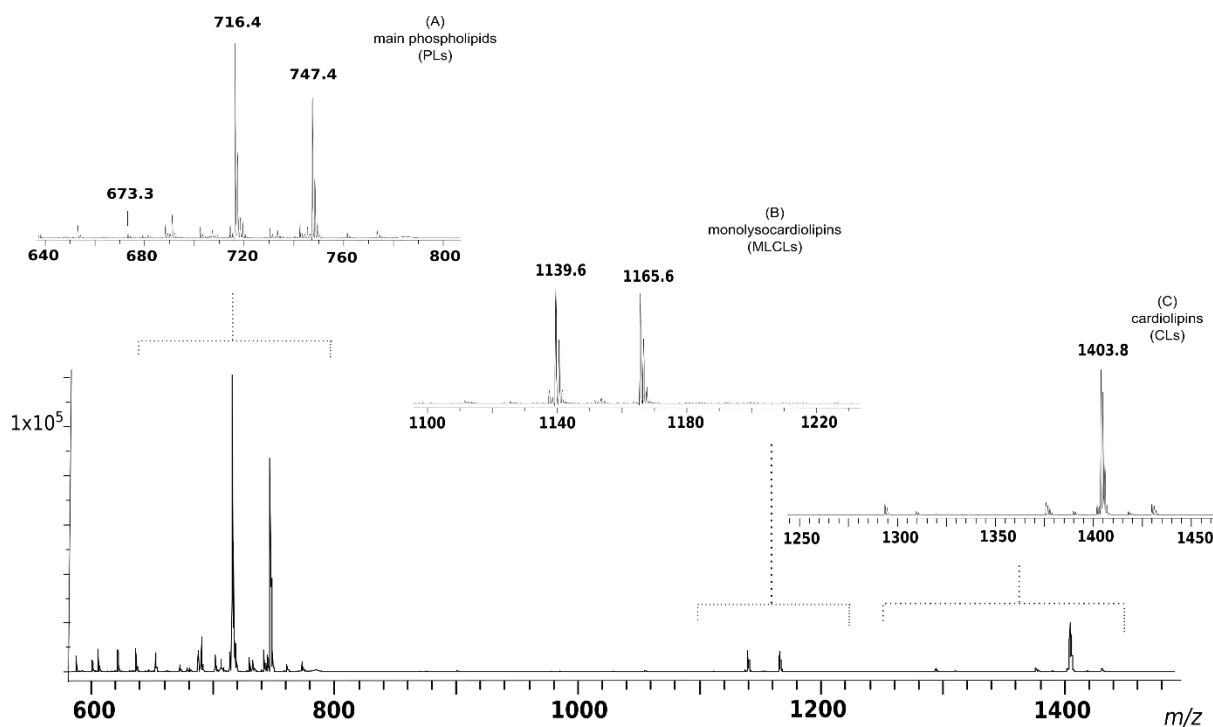

**Figure S1. MALDI-TOF/MS lipid profile of intact bacterial membranes of *A. baumannii* (full  $m/z$  range).** Mass spectra were acquired in negative ion mode using 9-aminoacridine as matrix. Bacterial membrane lipids have been analysed in intact membranes by avoiding lipid extraction and TLC separation steps, by following a procedure previously described in the literature that highly reduces the times of analyses and the possibility of introducing artifacts [25]. Mass spectrum in the lower panel represents the MALDI-TOF/MS lipid profile in the full  $m/z$  range 600-1500. In panel (A) x-axis enlargement of the  $m/z$  range 640-800 referable to the main phospholipids (PLs); in panel (B) x-axis enlargement of the  $m/z$  range 1100-1200 referable to the monolysocardiolipins (MLCLs); in panel (C) x-axis enlargement of the  $m/z$  range 1350-1450 referable to the cardiolipins (CLs). Peaks detected in intact membranes are the same present in the lipid extract.
